## Medical Hypothesis

### Extracting hydrocephalus diagnostic and therapeutic information from CSF proteomics

Arie Horowitz and Pascale Saugier-Veber<sup>1</sup>

**Correspondence:** Dr. Horowitz (arie2006@gmail.com)

#### Abstract

We hypothesize that the composition of the CSF provides specific information on damage sustained by the hydrocephalus-harboring brain and on its autoregulatory responses to the intracranial pressure (ICP) exerted on the parenchyma. The data analyzed to form this hypothesis was generated in a previous study by comparative proteomics of CSF collected from the brain of healthy and *Mpdz* knockout (KO) mice<sup>1</sup>. These mice phenocopy the severe hydrocephalus linked to human loss-of-function mutants of the same gene<sup>2, 3</sup>. The overall protein concentration was 2.5-fold higher in the CSF of *Mpdz* KO versus healthy mice. Practically all the 313 proteins identified by mass spectroscopy were overabundant in the CSF of the KO mice. Proteins that were more than 2-fold overabundant in the CSF of hydrocephalic mice were classified into seven functional groups. The overabundance of extracellular matrix (ECM) proteins, complement factors, and apolipoproteins indicated that the hydrocephalic brain underwent ischemia, inflammation, and demyelination. The overabundance of cytokine-binding proteins was linked uniquely to the activation of insulin-like growth factor (IGF) signaling. The overabundance of angiotensinogen and pigment epithelium-derived factor (PEDF) indicated the activity of negative-feedback mechanisms to reduce CSF production by the choroid plexus. These observations raise intriguing propositions: the composition of the CSF could be used as biomarker of case-specific injuries of ventriculomegaly in fetuses or neonates; once the overabundance of these biomarkers is detected, the IGF and angiotensin signaling pathways could be exploited to reduce CSF production as a non-invasive therapy, replacing or aiding current invasive treatments of hydrocephalus.

---

<sup>1</sup> University of Rouen, Rouen, France (P. S.-V.)

## Glossary

Apo = apolipoprotein; CNS = central nervous system; ECM = extracellular matrix; ETV = endoscopic third ventriculostomy; ICP = intracranial pressure; IGF = insulin-like growth factor; IGFBP = IGF-binding protein; KO = knockout; LFQ = label-free quantification; Mpdz = multi PDZ; PDZ = PSD-95 (= postsynaptic density 95), Dlg (= discs large), ZO-1 (= zonula occludens-1); PEDF = pigment epithelium-derived factor; SVZ = subventricular zone; VP = ventriculoperitoneal; WT = wild type.

---

Hydrocephalus is the most common cause of pediatric surgical intervention<sup>4</sup>, occurring about once per 1000 births in the US<sup>5</sup>. The currently available treatments, either ventriculoperitoneal (VP) shunting or endoscopic third ventriculostomy (ETV), fail in 12%-30%<sup>6</sup> or in 24%-45%<sup>7</sup> of cases, respectively. The hospitalization required for these procedures costs annually more than 2 billion dollars<sup>8</sup>. CSF drainage from the brain ventricles to the peritoneum, which is still the prevalent treatment for hydrocephalus, requires multiple revisions during the patients' lifetime at an average interval of 14.1 years<sup>9</sup>. These exigencies provide the rationale for the implementation of non-invasive approaches in place of or in support of invasive treatments. To date, no effective non-invasive treatment has been reported.

Shunt implantation facilitates sampling and analysis of the CSF for early detection of infection<sup>10</sup>. It could conceivably be analyzed also for the evaluation of the health of the parenchyma. If suitable markers are identified, their overabundance in the CSF of patients relative to the CSF of healthy subjects could potentially serve as biomarkers of case-specific injuries. Furthermore, the composition of the CSF could provide information on the responses of the brain to the elevated ICP exerted on the parenchyma as a result of ventriculomegaly. Delineation of the molecular pathways employed by the brain to this end could be used in principle to guide future pharmacological approaches, including the identification of new druggable targets.

The information gained from comparing the compositions of the CSF of hydrocephalic versus healthy subjects by proteomic analysis had been mined previously for studying the response of the brain to ventriculomegaly<sup>11</sup>. Similarly, such comparison had been used to identify biomarkers for facilitating the diagnosis and characterizing the pathophysiology of hydrocephalus<sup>12</sup>.

The following analysis, based on our published data<sup>1</sup>, reveals previously unappreciated information gained from comparative proteomic analysis between the CSF of healthy and hydrocephalus-harboring *Mpdz* KO mice. This information identifies the nature of the damage inflicted by ventriculomegaly on the parenchyma and detects autoregulatory pathways activated by the brain to counter this damage. These pathways could be exploited for therapeutic purposes.

## Methods

The animals, CSF collection, identification of its constituent proteins and measurement of their concentrations by mass spectroscopy were described in Yang et al., 2019<sup>1</sup>. Access to the mass spectroscopy data set is provided in the same publication.

## Results and Discussion

Out of the total 313 proteins identified in 3 samples of CSF from either wild type or *Mpdz* KO mice, 23 were at least twice overabundant in the CSF of the latter mice in a statistically significant manner (i.e.  $P$ , the probability of the null hypothesis, was  $\leq 0.05$ ) (Table 1). Based on their known attributes, we classified them into a relatively small number of functional groups (from top to bottom in Table 1): extracellular matrix (ECM), complement factors, lipoproteins, immune system proteins, cytokine binding proteins, enzymes and enzyme binding proteins, and peptidase inhibitors. Given the combination of these functional groups, the overabundance of the above 23 proteins was interpreted as a concerted

reaction of the parenchyma to ventriculomegaly rather than a haphazard collection<sup>1</sup>. The proteins were scanned against the literature to examine their potential association with central nervous system (CNS) pathological conditions. Based on the matches, the overabundance of each protein was classified into two groups: either as an indicator of damage or as a response of the parenchyma to the trauma of severe hydrocephalus. The inclusion of proteins in the causal group was informed by the known attributes of the pathophysiology of congenital hydrocephalus. Proteins were categorized as forming the brain's response if they were known as constituents of autoregulatory pathways that would potentially counter ventriculomegaly.

Despite the multiple etiologies of congenital hydrocephalus, i.e. 'obstructive' versus 'communicating', the pathophysiology of this condition is shaped primarily by ventriculomegaly and the ensuing elevation of ICP. The damage to the parenchyma is manifested as neuroinflammation and demyelination, one of the secondary injury mechanisms attributed to ventriculomegaly<sup>13</sup>. The compression exerted on the parenchyma by increased ICP is accompanied by cerebrovascular injury, resulting in ischemia and hypoxia<sup>14</sup>.

### **Biomarkers of brain injury**

There is evidence to associate most of the overabundant ECM proteins, as well as complement factors and apolipoproteins, with mechanisms of ventriculomegaly-inflicted injuries (Table 2). ECM1 had been linked to neuroinflammation, whereby it ameliorated the demyelination caused by T helper cells<sup>15</sup>. Plasma fibronectin, the soluble isoform detected in our previous study<sup>1</sup>, supported neuronal survival and reduced brain injury following cerebral ischemia<sup>16</sup>. Extracellular gelsolin ameliorated inflammation<sup>17</sup> and had a neuroprotective effect during stroke<sup>18</sup>. Vitronectin activated microglia<sup>19</sup>, the primary immune effector cells of the CNS.

The complement system has a neuroprotective role in CNS neurodegenerative diseases<sup>20</sup>. Specifically, complement C4-B is produced by microglial cells in response to ischemia and inflammation<sup>21</sup>. Complement regulator H is produced by neurons and has a protective function in neuroinflammation<sup>22</sup>. Properdin, named alternatively complement factor P, activates microglia and contributes to inflammation in response to ischemia<sup>23</sup>.

Apolipoprotein E (ApoE), which is produced by the choroid plexus<sup>24</sup>, protects the brain against injury and promotes neuronal survival<sup>24, 25</sup>. ApoD has a similar neuroprotective role in CNS degeneration<sup>26</sup>.

Collectively, the overabundance of the aforementioned ECM proteins, complement factors, and apolipoproteins reveal that severe hydrocephalus entails a set of injuries to the parenchyma that includes neuroinflammation and demyelination, impaired perfusion. Activation of CNS immune defense by microglial cells accompanies these processes and possibly aggravates inflammation. This injury pattern conforms to the empirical picture of neonatal hydrocephalus<sup>14</sup>.

### **Biomarkers of activate autoregulatory pathways**

The IGF-binding proteins (IGFBPs) are expressed in the CNS, including the choroid plexus<sup>27</sup>. Specifically, IGFBP2 and IGFBP4, which were overabundant in the CSF of *Mpdz* KO mice<sup>1</sup>, are produced by astrocytes in response to brain injury<sup>28</sup>. While the differential functions of each IGFBP are not fully understood, they are thought to stabilize IGF, extend its half-life<sup>29</sup>, and modulate its activity<sup>30</sup>.  $\alpha$ -2-HS-glycoprotein, which binds to and modulates the signaling of the IGF receptor<sup>31</sup>,  $\alpha$ -fetoprotein, a cytokine-binding<sup>32</sup> plasma component, and sulfhydryl oxidase 1 participate in IGF uptake and transport by IGFBPs<sup>33</sup>. Remarkably, all the 5 proteins in this group (Table 3) regulate multiple facets of IGF signaling. IGF is produced in choroid plexus epithelial cells<sup>34</sup>. Its secretion into the CSF is increased in response to injury<sup>35</sup>.

The two overabundant endopeptidase inhibitors, angiotensinogen and PEDF (Table 4), are biomarkers of pathways that would evidently remedy the detrimental effects of ventriculomegaly. Angiotensinogen is a precursor of angiotensin-2, a potent vasoconstrictor that reduces blood flow to the choroid plexus<sup>36</sup> and CSF production<sup>37</sup>, thus countering the rise of ICP and the expansion of the ventricles. PEDF, which is secreted by ependymal cells in the subventricular zone (SVZ)<sup>38</sup> would potentially have a similar negative effect on CSF production because of its anti-angiogenic activity<sup>39</sup>. Additionally, PEDF promotes self-renewal of neural stem cells in the SVZ niche<sup>38</sup>, thus possibly facilitating the replacement of neurons damaged as a result of the deformation of the parenchyma by the elevated ICP.

### **Potential diagnostic and therapeutic implications**

The hypothetical interpretation of the overabundance of ECM proteins, complement factors, and apolipoproteins as biomarkers of specific brain injuries inflicted by ventriculomegaly is supported by previous studies<sup>14</sup>. Their individual or collective overabundance could be potentially identified and measured in fetal CSF collected during corrective surgery for myelomeningocele or spina bifida, in the CSF of neonates collected during VP shunting or ETV, or in CSF drawn by lumbar puncture for other diagnostic purposes. Beyond verifying the occurrence of hydrocephalus, measuring the overabundance of individual biomarkers would highlight case-specific attributes, such as the presence of demyelination revealed by the overabundance of ECM1, or of an aggressive immune response flagged by the overabundances of vitronectin and complement factors.

The combined overabundance of 5 cytokine-binding proteins provides unambiguous evidence that IGF signaling is a major autoregulatory pathway employed by the brain to counteract the damage caused by ventriculomegaly. Similarly, the concurrence of the overabundances of angiotensinogen and PEDF is a strong indicator that reduction of CSF production is employed by the brain as a negative feedback loop to counter ventriculomegaly and increased ICP. Each of these pathways could potentially be exploited for non-invasive therapies in place of or as adjuvants to the current invasive approaches. Finally, the marked overabundances of ApoE and ApoD suggest that these apolipoproteins may be used directly for the neuroprotection of the parenchyma.

## References

1. Yang J, Simonneau C, Kilker R, et al. Murine MPDZ-linked hydrocephalus is caused by hyperpermeability of the choroid plexus. *EMBO Mol Med* 2019;11.
2. Al-Dosari MS, Al-Owain M, Tulbah M, et al. Mutation in MPDZ causes severe congenital hydrocephalus. *J Med Genet* 2013;50:54-58.
3. Saugier-veber P, Marguet F, Lecoquierre F, et al. Hydrocephalus due to multiple ependymal malformations is caused by mutations in the MPDZ gene. *Acta Neuropathol Commun* 2017;5:36.
4. Lim J, Tang AR, Liles C, et al. The cost of hydrocephalus: a cost-effectiveness model for evaluating surgical techniques. *J Neurosurg Pediatr* 2018;23:109-118.
5. Kahle KT, Kulkarni AV, Limbrick DD, Jr., Warf BC. Hydrocephalus in children. *Lancet* 2016;387:788-799.
6. Al-Tamimi YZ, Sinha P, Chumas PD, et al. Ventriculoperitoneal shunt 30-day failure rate: a retrospective international cohort study. *Neurosurgery* 2014;74:29-34.
7. Kulkarni AV, Riva-Cambrin J, Holubkov R, et al. Endoscopic third ventriculostomy in children: prospective, multicenter results from the Hydrocephalus Clinical Research Network. *J Neurosurg Pediatr* 2016;18:423-429.
8. Stein SC, Guo W. Have we made progress in preventing shunt failure? A critical analysis. *J Neurosurg Pediatr* 2008;1:40-47.
9. Reddy GK, Bollam P, Caldito G. Long-term outcomes of ventriculoperitoneal shunt surgery in patients with hydrocephalus. *World Neurosurg* 2014;81:404-410.
10. Khalil A, Mandiwanza T, Zakaria Z, Crimmins D. Routine cerebrospinal fluid analysis during 'de novo' ventriculoperitoneal shunt insertion: Single Institution Experience. *Br J Neurosurg* 2016;30:427-428.
11. Owen-Lynch PJ, Draper CE, Mashayekhi F, Bannister CM, Miyan JA. Defective cell cycle control underlies abnormal cortical development in the hydrocephalic Texas rat. *Brain* 2003;126:623-631.
12. Jeppsson A, Zetterberg H, Blennow K, Wikkelso C. Idiopathic normal-pressure hydrocephalus: pathophysiology and diagnosis by CSF biomarkers. *Neurology* 2013;80:1385-1392.
13. McAllister JP, 2nd, Chovan P. Neonatal hydrocephalus. Mechanisms and consequences. *Neurosurg Clin N Am* 1998;9:73-93.
14. McAllister JP, 2nd. Pathophysiology of congenital and neonatal hydrocephalus. *Semin Fetal Neonatal Med* 2012;17:285-294.
15. Su P, Chen S, Zheng YH, et al. Novel Function of Extracellular Matrix Protein 1 in Suppressing Th17 Cell Development in Experimental Autoimmune Encephalomyelitis. *J Immunol* 2016;197:1054-1064.
16. Sakai T, Johnson KJ, Murozono M, et al. Plasma fibronectin supports neuronal survival and reduces brain injury following transient focal cerebral ischemia but is not essential for skin-wound healing and hemostasis. *Nat Med* 2001;7:324-330.
17. Bucki R, Byfield FJ, Kulakowska A, et al. Extracellular gelsolin binds lipoteichoic acid and modulates cellular response to proinflammatory bacterial wall components. *J Immunol* 2008;181:4936-4944.
18. Endres M, Fink K, Zhu J, et al. Neuroprotective effects of gelsolin during murine stroke. *J Clin Invest* 1999;103:347-354.
19. Milner R, Campbell IL. Cytokines regulate microglial adhesion to laminin and astrocyte extracellular matrix via protein kinase C-dependent activation of the alpha6beta1 integrin. *J Neurosci* 2002;22:1562-1572.
20. Bonifati DM, Kishore U. Role of complement in neurodegeneration and neuroinflammation. *Mol Immunol* 2007;44:999-1010.
21. D'Ambrosio AL, Pinsky DJ, Connolly ES. The role of the complement cascade in ischemia/reperfusion injury: implications for neuroprotection. *Mol Med* 2001;7:367-382.
22. Griffiths MR, Neal JW, Fontaine M, Das T, Gasque P. Complement factor H, a marker of self protects against experimental autoimmune encephalomyelitis. *J Immunol* 2009;182:4368-4377.

23. Sisa C, Agha-Shah Q, Sanghera B, Carno A, Stover C, Hristova M. Properdin: A Novel Target for Neuroprotection in Neonatal Hypoxic-Ischemic Brain Injury. *Front Immunol* 2019;10:2610.
24. Xu Q, Bernardo A, Walker D, Kanegawa T, Mahley RW, Huang Y. Profile and regulation of apolipoprotein E (ApoE) expression in the CNS in mice with targeting of green fluorescent protein gene to the ApoE locus. *J Neurosci* 2006;26:4985-4994.
25. Beffert U, Nematollah Farsian F, Masiulis I, et al. ApoE receptor 2 controls neuronal survival in the adult brain. *Curr Biol* 2006;16:2446-2452.
26. Navarro A, Mendez E, Diaz C, et al. Lifelong expression of apolipoprotein D in the human brainstem: correlation with reduced age-related neurodegeneration. *PLoS One* 2013;8:e77852.
27. Tseng LY, Brown AL, Yang YW, et al. The fetal rat binding protein for insulin-like growth factors is expressed in the choroid plexus and cerebrospinal fluid of adult rats. *Mol Endocrinol* 1989;3:1559-1568.
28. Lewitt MS, Boyd GW. The Role of Insulin-Like Growth Factors and Insulin-Like Growth Factor-Binding Proteins in the Nervous System. *Biochem Insights* 2019;12:1178626419842176.
29. Zapf J, Hauri C, Waldvogel M, Froesch ER. Acute metabolic effects and half-lives of intravenously administered insulinlike growth factors I and II in normal and hypophysectomized rats. *J Clin Invest* 1986;77:1768-1775.
30. Firth SM, Baxter RC. Cellular actions of the insulin-like growth factor binding proteins. *Endocr Rev* 2002;23:824-854.
31. Mathews ST, Chellam N, Srinivas PR, et al. Alpha2-HSG, a specific inhibitor of insulin receptor autophosphorylation, interacts with the insulin receptor. *Mol Cell Endocrinol* 2000;164:87-98.
32. Mori K, Emoto M, Inaba M. Fetuin-A: a multifunctional protein. *Recent Pat Endocr Metab Immune Drug Discov* 2011;5:124-146.
33. May B, Jupe S., Charalambous, M., de Bono, B., Scott, J., Tatoud, R. Signaling by Type 1 Insulin-like Growth Factor 1 Receptor. *Reactome*, release 72 2012.
34. Stylianopoulou F, Herbert J, Soares MB, Efstratiadis A. Expression of the insulin-like growth factor II gene in the choroid plexus and the leptomeninges of the adult rat central nervous system. *Proc Natl Acad Sci U S A* 1988;85:141-145.
35. Walter HJ, Berry M, Hill DJ, Cwyfan-Hughes S, Holly JM, Logan A. Distinct sites of insulin-like growth factor (IGF)-II expression and localization in lesioned rat brain: possible roles of IGF binding proteins (IGFBPs) in the mediation of IGF-II activity. *Endocrinology* 1999;140:520-532.
36. Maktabi MA, Heistad DD, Faraci FM. Effects of angiotensin II on blood flow to choroid plexus. *Am J Physiol* 1990;258:H414-418.
37. Maktabi MA, Stachovic GC, Faraci FM. Angiotensin II decreases the rate of production of cerebrospinal fluid. *Brain Res* 1993;606:44-49.
38. Ramirez-Castillejo C, Sanchez-Sanchez F, Andreu-Agullo C, et al. Pigment epithelium-derived factor is a niche signal for neural stem cell renewal. *Nat Neurosci* 2006;9:331-339.
39. Dawson DW, Volpert OV, Gillis P, et al. Pigment epithelium-derived factor: a potent inhibitor of angiogenesis. *Science* 1999;285:245-248.

**Table 1:** List of proteins that were at least twice overabundant in the CSF of *Mpdz* KO mice relative to the CSF of healthy mice with a null hypothesis probability (*P*) of  $\leq 0.05^1$ . The alternative clear and gray shadings separate the functional groups with which each protein is associated (from top to bottom): ECM proteins, complement factors, apolipoproteins, immune system proteins, cytokine binding proteins, enzymes and enzyme-binding proteins, and endopeptidase inhibitors. The ratios of label-free quantification (LFQ) intensities provide the KO to wild type (WT) relative abundance of each protein (modified from Yang et al., 2019<sup>1</sup>).

| Protein name                                    | Gene ID  | MW (kDa) | Average LFQ intensities ( $\times 10^3$ ) |                            | LFQ KO/WT ratio | P-value |
|-------------------------------------------------|----------|----------|-------------------------------------------|----------------------------|-----------------|---------|
|                                                 |          |          | <i>Mpdz</i> <sup>+/+</sup>                | <i>Mpdz</i> <sup>-/-</sup> |                 |         |
| Extracellular matrix protein 1                  | Ecm1     | 48.356   | 9.247                                     | 108.1                      | 11.691          | 0.0012  |
| Fibronectin                                     | Fn1      | 272.53   | 594.234                                   | 6292.53                    | 10.589          | 0.015   |
| Gelsolin                                        | Gsn      | 85.94    | 2186.3                                    | 9651.9                     | 4.415           | 0.0018  |
| Vitronectin                                     | Vtn      | 54.84    | 409.711                                   | 1280.37                    | 3.125           | 0.026   |
| Complement C4-B                                 | C4b      | 192.91   | 586938                                    | 3005.67                    | 5.121           | 0.0091  |
| Complement factor H                             | Cfh      | 139.14   | 3049.323                                  | 9739.17                    | 3.194           | 0.042   |
| Properdin                                       | Cfp      | 50.32    | 101.668                                   | 283.75                     | 2.791           | 0.042   |
| Fibrinogen $\beta$ chain                        | Fgb      | 54.75    | 45.285                                    | 2175.04                    | 48.03           | 0.027   |
| Apolipoprotein D                                | ApoD     | 21.53    | 45.159                                    | 604.07                     | 13.377          | 0.0003  |
| Apolipoprotein E                                | ApoE     | 35.87    | 955.539                                   | 50725                      | 53.085          | 0.011   |
| $\beta$ -2-microglobulin                        | B2m      | 13.78    | 425.157                                   | 1419.5                     | 3.339           | 0.0074  |
| Macrophage colony-stimulating factor 1 receptor | Csf1r    | 109.18   | 22.71                                     | 141.25                     | 6.22            | 0.01    |
| $\alpha$ -fetoprotein                           | Afp      | 67.34    | 78.845                                    | 567.28                     | 7.195           | 0.008   |
| $\alpha$ -2-HS-glycoprotein                     | Ahsg     | 37.32    | 7831.367                                  | 44357.3                    | 5.664           | 0.024   |
| Insulin-like growth factor-binding protein 2    | Igfbp2   | 32.846   | 62.722                                    | 1156.4                     | 18.437          | 0.0005  |
| Insulin-like growth factor-binding protein 4    | Igfbp4   | 27.81    | 2.61                                      | 53257                      | 20.381          | 0.0003  |
| Sulfhydryl oxidase 1                            | Qsox1    | 63.34    | 60.672                                    | 288.44                     | 4.754           | 0.035   |
| $\alpha$ -2-macroglobulin-P                     | A2m      | 164.35   | 125.699                                   | 4668.7                     | 37.142          | 0.0007  |
| Lysozyme C-2                                    | Lyz2     | 16.69    | 49.978                                    | 2118.97                    | 42.398          | 0.017   |
| Angiotensinogen                                 | Agt      | 51.99    | 106.615                                   | 877.37                     | 8.229           | 0.003   |
| Pigment epithelium-derived factor               | Serpinf1 | 46.23    | 36.352                                    | 408.52                     | 11.238          | 0.0009  |

**Table 2:** ECM, complement factor, and apolipoproteins, and the type of injury indicated by each protein.

| <b>Protein name</b>            | <b>Gene ID</b> | <b>LFQ KO/WT ratio</b> | <b>Indicated injury</b>                          | <b>References</b> |
|--------------------------------|----------------|------------------------|--------------------------------------------------|-------------------|
| Extracellular matrix protein 1 | Ecm1           | 11.691                 | Neuroinflammation, demyelination                 | 15                |
| Fibronectin                    | Fn1            | 10.589                 | Neuronal survival                                | 16                |
| Gelsolin                       | Gsn            | 4.415                  | Amelioration of inflammation and neuroprotection | 17, 18            |
| Vitronectin                    | Vtn            | 3.125                  | Activation of microglia                          | 19                |
| Complement C4-B                | C4b            | 5.121                  | Response to ischemia and inflammation            | 21                |
| Complement factor H            | Cfh            | 3.194                  | Protective function in neuroinflammation         | 22                |
| Properdin                      | Cfp            | 2.791                  | Activation of microglia                          | 23                |
| Apolipoprotein D               | ApoD           | 48.03                  | Neuroprotection and survival                     | 24, 25            |
| Apolipoprotein E               | ApoE           | 13.377                 | Neuroprotection                                  | 26                |



**Table 3:** Cytokine-binding proteins and their roles in IGF signaling.

| <b>Protein name</b>                          | <b>Gene ID</b> | <b>LFQ KO/WT ratio</b> | <b>Role in IGF signaling</b>                     | <b>References</b> |
|----------------------------------------------|----------------|------------------------|--------------------------------------------------|-------------------|
| Insulin-like growth factor-binding protein 2 | Igfbp2         | 18.437                 | Neuronal survival                                | 27-30             |
| Insulin-like growth factor-binding protein 4 | Igfbp4         | 20.381                 | Amelioration of inflammation and neuroprotection | 27-30             |
| $\alpha$ -2-HS-glycoprotein                  | Ahsg           | 5.664                  | Neuroinflammation, demyelination                 | 31                |
| $\alpha$ -fetoprotein                        | Afp            | 7.195                  | Activation of microglia                          | 32                |
| Sulfhydryl oxidase 1                         | Qsox1          | 4.754                  | IGF uptake and transport by IGFBPs               | 33                |

**Table 4:** Endopeptidases and their roles in negative-feedback autoregulation of ventriculomegaly.

| <b>Protein name</b>               | <b>Gene ID</b> | <b>LFQ KO/WT ratio</b> | <b>Negative-feedback autoregulation</b>                         | <b>References</b> |
|-----------------------------------|----------------|------------------------|-----------------------------------------------------------------|-------------------|
| Angiotensinogen                   | Agt            | 8.229                  | Vasoconstriction; reduction of blood flow to the choroid plexus | 36, 37            |
| Pigment epithelium-derived factor | Serpinf1       | 11.238                 | Anti-angiogenesis, neural stem cell self-renewal                | 38, 39            |
